# Supplementary material
Source: publisher figshare collection journal article supplement (https://frontiersin.figshare.com/ndownloader/files/15681728)
Supplement: Supplementary file [file 15681728]

### Supplementary figure 1

ELISA analysis of blood serum at 4wks post-NCSE

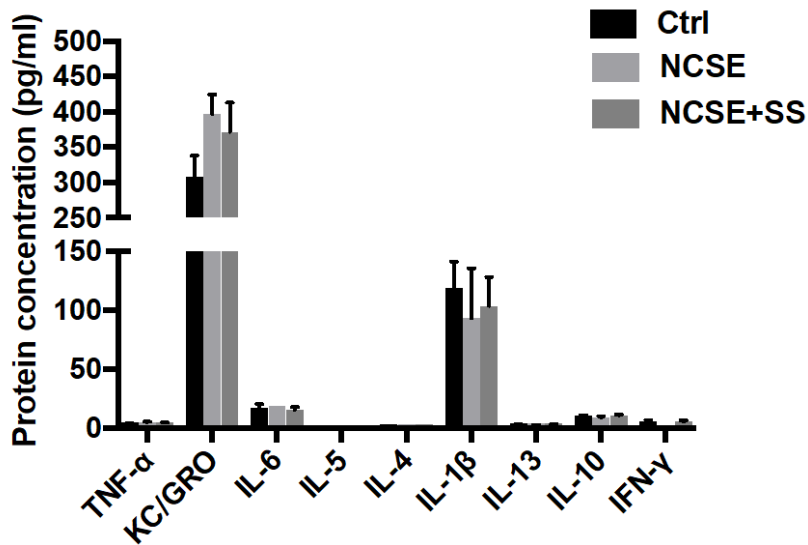

**S1 Figure. ELISA analysis of pro- and anti-inflammatory cytokines and chemokines in serum 4wks following NCSE.** ELISA analysis of cytokines and chemokines in serum, 4wks following NCSE with or without spontaneous seizures. Data are presented as mean±standard error of mean: Ctrl; n =7-12, NCSE; n= 3-4, NCSE+ spontaneous seizures; n=10-12. \*p < 0.05, unpaired t test. TNF-α; tumour necrosis factor alpha, KC/GRO; keratinocyte chemoattractant/human growth-regulated oncogene, IL; interleukin, IFN-γ; interferon gamma.
